# Supplementary material for: BSA-exfoliated WSe2 nanosheets as a photoregulated carrier for synergistic photodynamic/photothermal therapy
Source: Royal Society of Chemistry journal article supplement (doi:10.1039/c6tb02525k), 2016-11-28
Supplement: c6tb02525k1.pdf [file c6tb02525k1.pdf]

## Supporting Information

### BSA-Exfoliated WSe<sub>2</sub> Nanosheets as a Photoregulated Carrier for Synergistic Photodynamic/Photothermal Therapy

Xiaodan Jia, Jing Bai, Zhifang Ma, Xiue Jiang\*

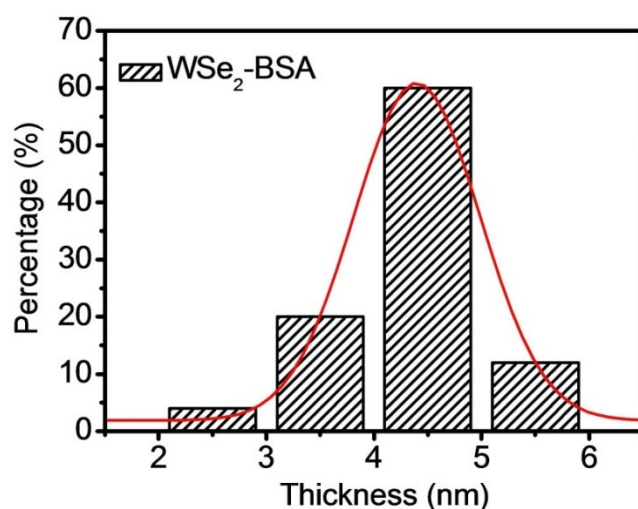

Fig. S1 AFM measured thickness distributions of WSe<sub>2</sub>-BSA nanosheets.

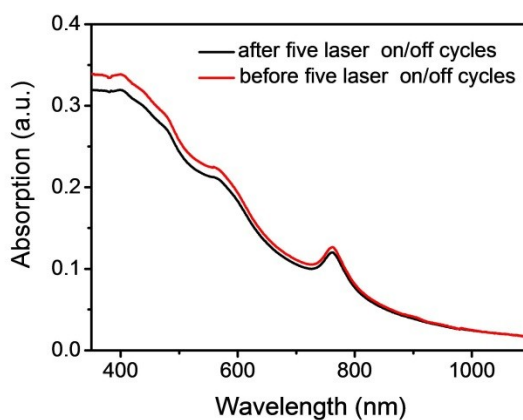

Fig. S2 UV-vis absorption spectrum of WSe<sub>2</sub>-BSA nanosheets before (red) and after (black) five laser on/off cycles

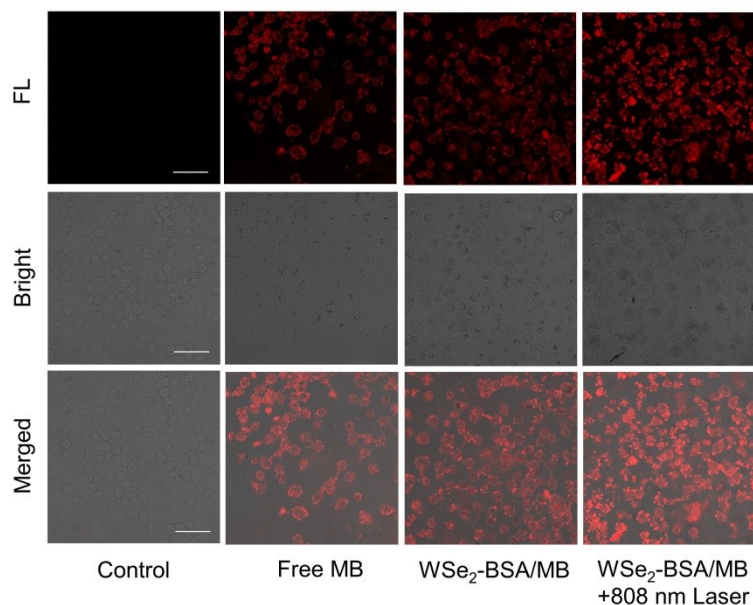

Fig. S3 The confocal images of HeLa cells treated with DMEM, free MB, WSe<sub>2</sub>-BSA/MB, WSe<sub>2</sub>-BSA/MB +808 nm laser (1.65 W/cm<sup>2</sup>, 5min) for 3h, respectively. The concentration of WSe<sub>2</sub>-BSA and MB was fixed at 0.2 mg/mL and 20 μM, respectively.

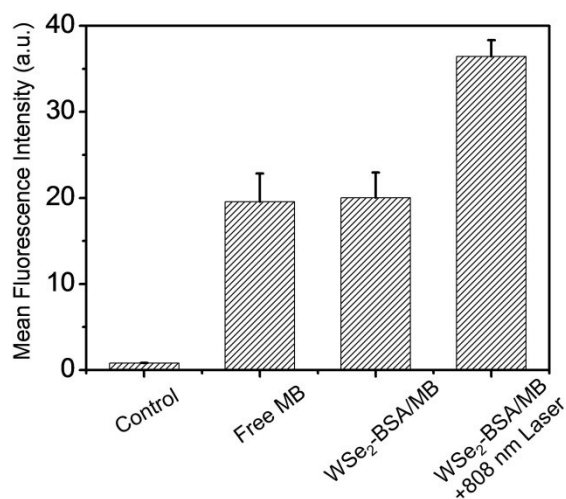

Fig. S4 The mean fluorescence intensity of MB of the HeLa cells treated with DMEM, free MB, WSe<sub>2</sub>-BSA/MB, WSe<sub>2</sub>-BSA/MB +808 nm laser (1.65 W/cm<sup>2</sup>, 5min) for 3h, respectively. The concentration of WSe<sub>2</sub>-BSA and MB was fixed at 0.2 mg/mL and 20 μM, respectively.

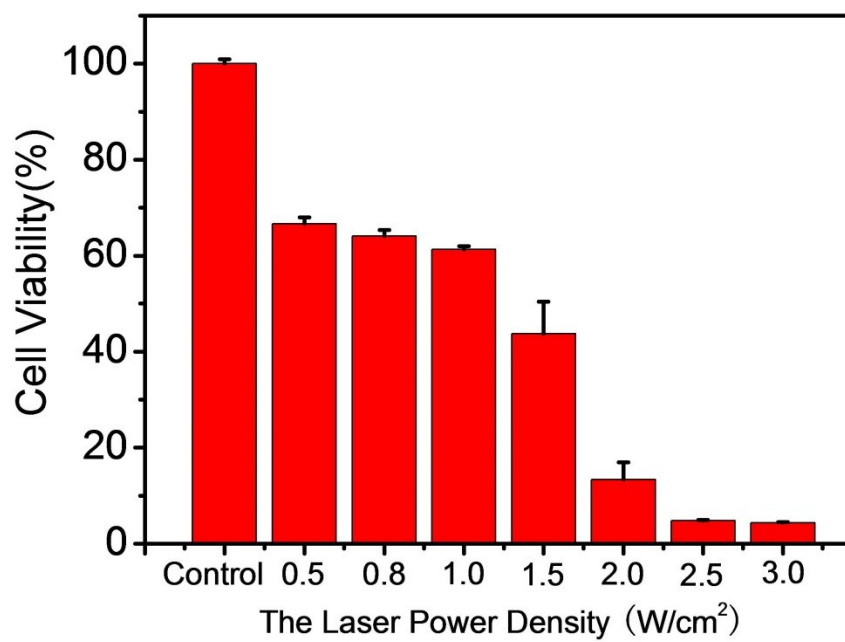

Fig. S5 In vitro cell viabilities after incubation with 0.2 mg/mL of WSe<sub>2</sub>-BSA, and irradiated by 808 nm NIR light with various power densities.
